# Supplementary material for: Genome-Wide Identification and Characterization of the bHLH Gene Family and Its Response to Abiotic Stresses in Carthamus tinctorius
Source: MDPI journal article supplement (doi:10.3390/plants12213764), 2023-11-03
Supplement: s1 [file s1]

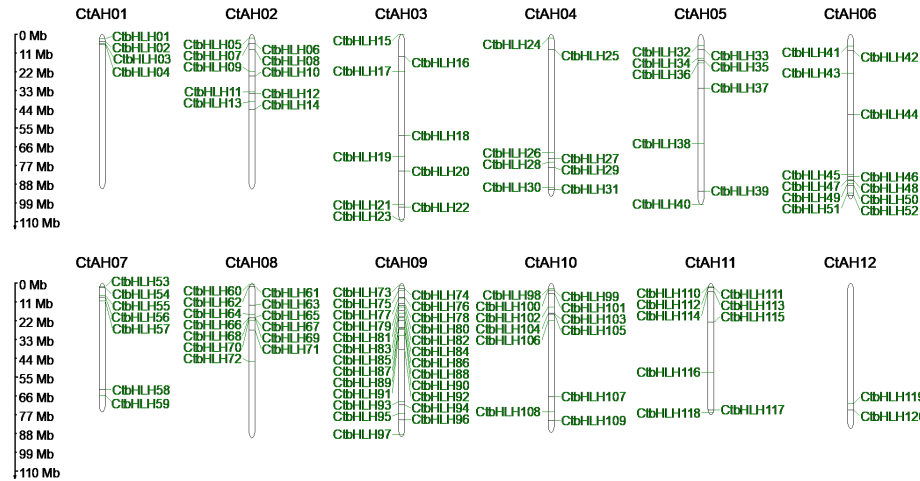

**Figure S1.** Chromosomal locations of the *CtbHLH* genes. The 120 *CtbHLH* genes were distributed on 12 pseudo-chromosomes of *C. tinctorius* based on their physical position.

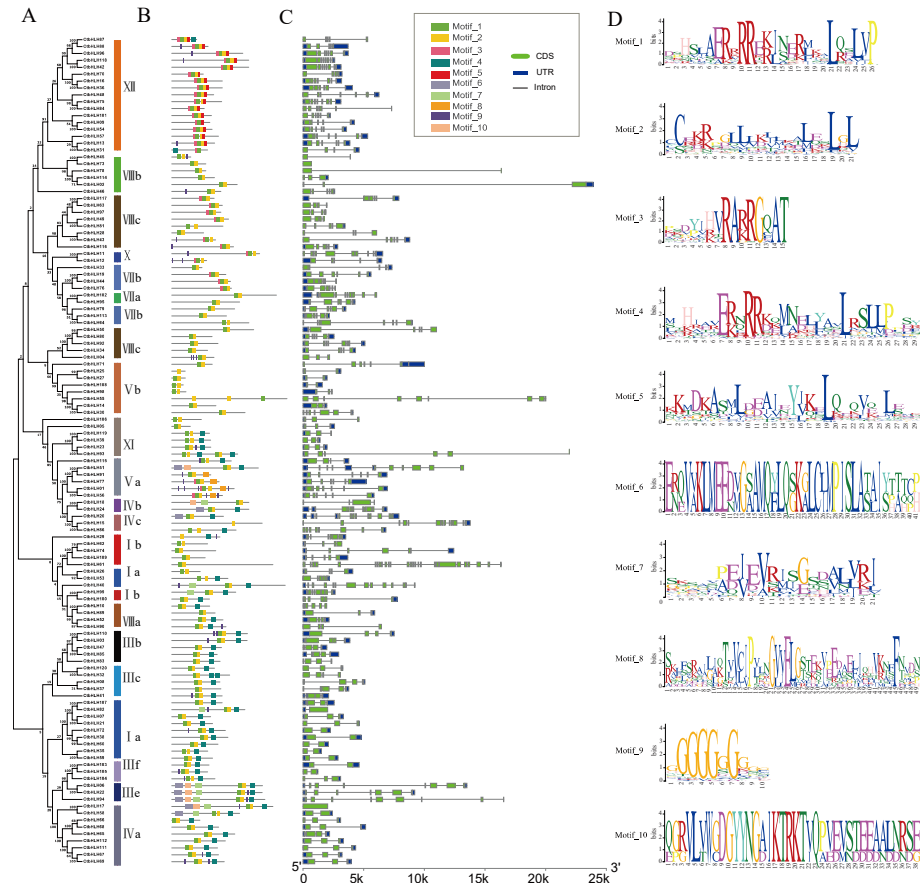

**Figure S2.** (A) Phylogenetic tree of *CtbHLH*s constructed using MEGA7.0 software with the neighbor joining method based on the alignments of complete predicted protein sequences of *CtbHLH* genes; (B) Conserved motif distributions of the *CtbHLH* genes of 120 proteins were identified using MEME-Suite 5.1.1, different colors represent different motifs; (C) Exon-intron structural analysis of *CtbHLH* genes

were determined using TBtools v1.130, where blue and green boxes represent untranslated regions and exons, respectively, while black lines represent introns; (D) Sequence logos for motif 1-10.

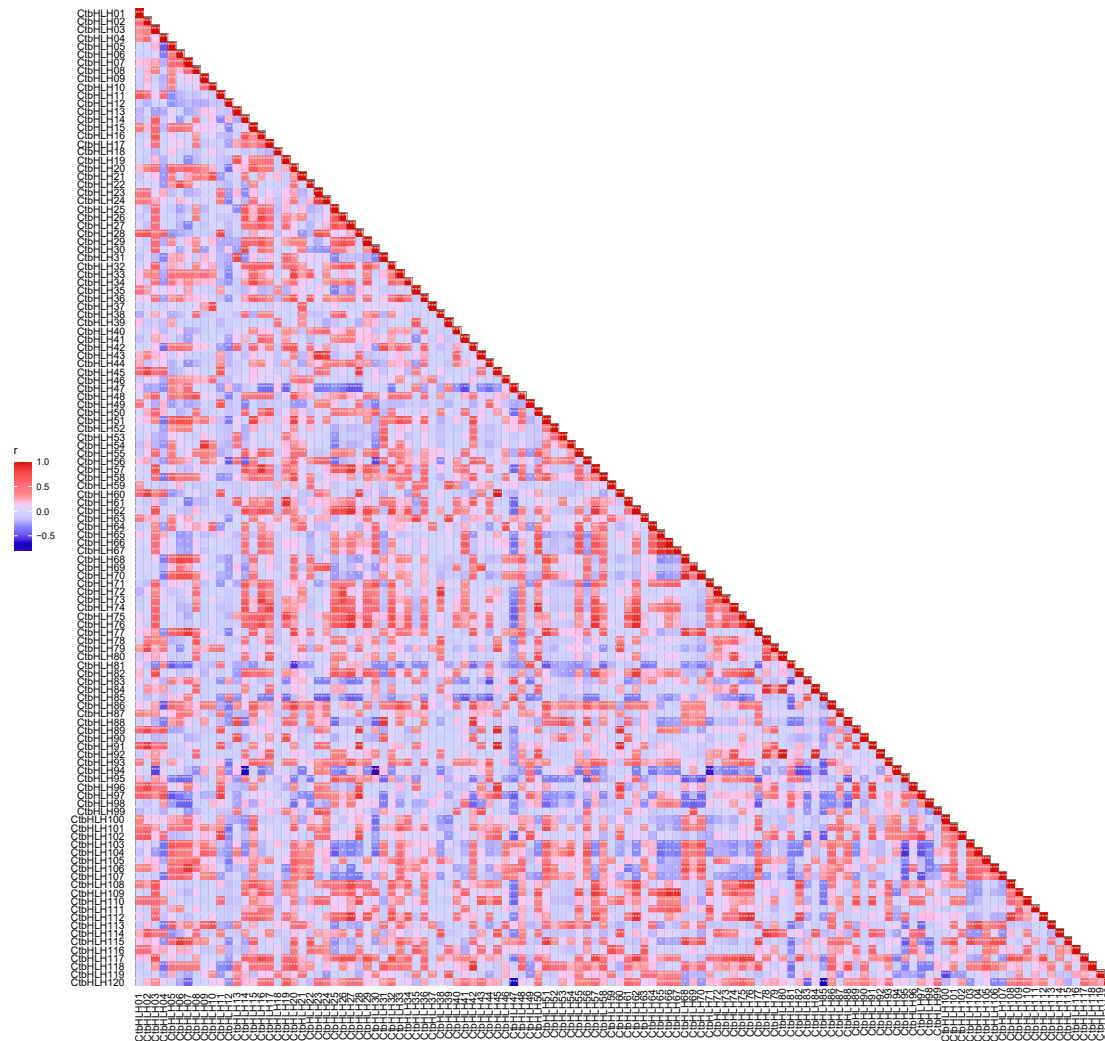

**Figure S3.** Co-expression analysis of *CtbHLH* genes. \*  $p < 0.05$ .

**Figure S4.** Cis-regulatory elements in the promoter region of *CtbHLH* genes determined from PlantCARE database. The figure represents the number of each type of regulatory element identified in the promoter sequence of *CtbHLH* genes. The darker the red color, the higher the number of regulatory elements in the promoter regions of *CtbHLH* genes.

**Figure S4.** Cis-regulatory elements in the promoter region of *CtbHLH* genes determined from PlantCARE database. The figure represents the number of each type of regulatory element identified in the promoter sequence of *CtbHLH* genes. The darker the red color, the higher the number of regulatory elements in the promoter regions of *CtbHLH* genes.

**Table S1.** Information for the bHLH transcription factor family in *C.tinctorius*

| Gene Locus            | Gene Name       | protein    |          |       | Instability<br>Index | Sucellular<br>Location |
|-----------------------|-----------------|------------|----------|-------|----------------------|------------------------|
|                       |                 | Length(aa) | MW(Da)   | pI    |                      |                        |
| <i>CtAH01G0020600</i> | <i>CtbHLH01</i> | 429        | 47997.41 | 6.15  | 58.15                | nucleus                |
| <i>CtAH01G0029900</i> | <i>CtbHLH02</i> | 127        | 14205.52 | 10.14 | 63.2                 | cytosol                |
| <i>CtAH01G0038500</i> | <i>CtbHLH03</i> | 341        | 38402.87 | 4.96  | 55.61                | nucleus                |
| <i>CtAH01G0040800</i> | <i>CtbHLH04</i> | 328        | 35938.09 | 6.18  | 56.51                | nucleus                |
| <i>CtAH02G0016800</i> | <i>CtbHLH05</i> | 578        | 65695.27 | 4.93  | 49.28                | nucleus                |
| <i>CtAH02G0038900</i> | <i>CtbHLH06</i> | 674        | 73666.67 | 5.82  | 40.56                | nucleus                |
| <i>CtAH02G0039700</i> | <i>CtbHLH07</i> | 358        | 39900.96 | 6.27  | 55.71                | nucleus                |
| <i>CtAH02G0066300</i> | <i>CtbHLH08</i> | 427        | 47957.88 | 8.19  | 42.46                | cytosol                |
| <i>CtAH02G0119600</i> | <i>CtbHLH09</i> | 286        | 30609.83 | 6.98  | 59.3                 | nucleus                |
| <i>CtAH02G0126300</i> | <i>CtbHLH10</i> | 90         | 10050.45 | 8.93  | 55.51                | mitochondria           |
| <i>CtAH02G0149400</i> | <i>CtbHLH11</i> | 342        | 38328.59 | 9.18  | 57.75                | nucleus                |
| <i>CtAH02G0150000</i> | <i>CtbHLH12</i> | 213        | 23745.1  | 6.5   | 69.52                | nucleus                |
| <i>CtAH02G0153300</i> | <i>CtbHLH13</i> | 254        | 28398.47 | 6.11  | 40.41                | nucleus                |
| <i>CtAH02G0158200</i> | <i>CtbHLH14</i> | 358        | 39842.52 | 6.01  | 63.32                | nucleus                |
| <i>CtAH03G0001000</i> | <i>CtbHLH15</i> | 1465       | 161456.2 | 6.21  | 42.53                | nucleus                |
| <i>CtAH03G0067400</i> | <i>CtbHLH16</i> | 338        | 38125.37 | 8.39  | 42.49                | nucleus                |
| <i>CtAH03G0094800</i> | <i>CtbHLH17</i> | 336        | 37392.52 | 7.21  | 50.96                | nucleus                |
| <i>CtAH03G0142200</i> | <i>CtbHLH18</i> | 240        | 26998.19 | 5.83  | 44.65                | nucleus                |
| <i>CtAH03G0167300</i> | <i>CtbHLH19</i> | 452        | 48981.62 | 9.13  | 54.15                | nucleus                |
| <i>CtAH03G0189300</i> | <i>CtbHLH20</i> | 224        | 25305.7  | 6.15  | 50.02                | nucleus                |
| <i>CtAH03G0257900</i> | <i>CtbHLH21</i> | 306        | 34336.97 | 6.76  | 60.44                | nucleus                |
| <i>CtAH03G0265000</i> | <i>CtbHLH22</i> | 452        | 50694.98 | 5.99  | 62.72                | nucleus                |
| <i>CtAH03G0305900</i> | <i>CtbHLH23</i> | 261        | 28418.81 | 4.69  | 59.28                | nucleus                |
| <i>CtAH04G0015500</i> | <i>CtbHLH24</i> | 294        | 32749.16 | 5.93  | 67.22                | nucleus                |
| <i>CtAH04G0048700</i> | <i>CtbHLH25</i> | 273        | 30783.98 | 8.31  | 55.28                | nucleus                |
| <i>CtAH04G0141400</i> | <i>CtbHLH26</i> | 198        | 21950.98 | 9.07  | 49.97                | nucleus                |
| <i>CtAH04G0149100</i> | <i>CtbHLH27</i> | 249        | 27766.58 | 9.15  | 37.79                | nucleus                |
| <i>CtAH04G0155900</i> | <i>CtbHLH28</i> | 413        | 45807.21 | 6.35  | 68.32                | nucleus                |
| <i>CtAH04G0167000</i> | <i>CtbHLH29</i> | 397        | 45255.72 | 5.64  | 42.2                 | nucleus                |
| <i>CtAH04G0222200</i> | <i>CtbHLH30</i> | 375        | 42123.27 | 6.37  | 69.08                | nucleus                |
| <i>CtAH04G0226500</i> | <i>CtbHLH31</i> | 269        | 30529.58 | 5.99  | 40.16                | nucleus                |
| <i>CtAH05G0045700</i> | <i>CtbHLH32</i> | 252        | 28880.56 | 4.9   | 64.2                 | nucleus                |
| <i>CtAH05G0059100</i> | <i>CtbHLH33</i> | 698        | 76626.45 | 6.31  | 59.42                | nucleus                |
| <i>CtAH05G0088900</i> | <i>CtbHLH34</i> | 283        | 31696.5  | 5.59  | 52.8                 | nucleus                |
| <i>CtAH05G0094600</i> | <i>CtbHLH35</i> | 260        | 29349.19 | 6.46  | 43.94                | nucleus                |
| <i>CtAH05G0102400</i> | <i>CtbHLH36</i> | 337        | 37724    | 5.81  | 49.89                | nucleus                |
| <i>CtAH05G0151900</i> | <i>CtbHLH37</i> | 757        | 85427.54 | 5.09  | 47.05                | nucleus                |
| <i>CtAH05G0184800</i> | <i>CtbHLH38</i> | 188        | 20996.41 | 9.07  | 75.37                | chloroplast            |
| <i>CtAH05G0245200</i> | <i>CtbHLH39</i> | 417        | 43305.13 | 6.25  | 50.51                | nucleus                |
| <i>CtAH05G0277500</i> | <i>CtbHLH40</i> | 489        | 55480.57 | 7.09  | 67.24                | nucleus                |

Table S1. *Cont.*

| Gene Locus            | Gene Name       | protein    |          |      | Instability<br>Index | Sucellular<br>Location |
|-----------------------|-----------------|------------|----------|------|----------------------|------------------------|
|                       |                 | Length(aa) | MW(Da)   | pI   |                      |                        |
| <i>CtAH06G0053200</i> | <i>CtbHLH41</i> | 375        | 41702.87 | 5.89 | 44.15                | nucleus                |
| <i>CtAH06G0071400</i> | <i>CtbHLH42</i> | 513        | 56099.86 | 5.61 | 42.63                | nucleus                |
| <i>CtAH06G0125600</i> | <i>CtbHLH43</i> | 586        | 65573.53 | 6.35 | 62.06                | nucleus                |
| <i>CtAH06G0176400</i> | <i>CtbHLH44</i> | 420        | 46605.52 | 9    | 54.95                | nucleus                |
| <i>CtAH06G0257600</i> | <i>CtbHLH45</i> | 285        | 31634.02 | 7.28 | 45.39                | nucleus                |
| <i>CtAH06G0264200</i> | <i>CtbHLH46</i> | 282        | 30877.64 | 5.92 | 50.13                | nucleus                |
| <i>CtAH06G0272000</i> | <i>CtbHLH47</i> | 505        | 54784.7  | 5.58 | 54.49                | nucleus                |
| <i>CtAH06G0273300</i> | <i>CtbHLH48</i> | 280        | 31694.09 | 9.23 | 35.69                | chloroplast            |
| <i>CtAH06G0287100</i> | <i>CtbHLH49</i> | 233        | 25393.33 | 5.28 | 55.85                | nucleus                |
| <i>CtAH06G0292900</i> | <i>CtbHLH50</i> | 328        | 37051.15 | 4.89 | 53.36                | nucleus                |
| <i>CtAH06G0313000</i> | <i>CtbHLH51</i> | 515        | 56186.75 | 8.07 | 58.65                | nucleus                |
| <i>CtAH06G0321500</i> | <i>CtbHLH52</i> | 77         | 8726.93  | 8.66 | 62.91                | nucleus                |
| <i>CtAH07G0013900</i> | <i>CtbHLH53</i> | 124        | 14092.12 | 9.46 | 71.65                | nucleus                |
| <i>CtAH07G0018800</i> | <i>CtbHLH54</i> | 239        | 26258.5  | 5.64 | 66.31                | nucleus                |
| <i>CtAH07G0053100</i> | <i>CtbHLH55</i> | 309        | 34072.28 | 8.39 | 57.54                | nucleus                |
| <i>CtAH07G0058200</i> | <i>CtbHLH56</i> | 321        | 34675.18 | 4.93 | 49.59                | nucleus                |
| <i>CtAH07G0073400</i> | <i>CtbHLH57</i> | 265        | 29739.53 | 6.36 | 47.94                | nucleus                |
| <i>CtAH07G0199100</i> | <i>CtbHLH58</i> | 336        | 37338.69 | 7.72 | 47.03                | nucleus                |
| <i>CtAH07G0211100</i> | <i>CtbHLH59</i> | 272        | 30690.71 | 5.72 | 40.18                | nucleus                |
| <i>CtAH08G0007100</i> | <i>CtbHLH60</i> | 313        | 34517.06 | 5.5  | 57.21                | nucleus                |
| <i>CtAH08G0015700</i> | <i>CtbHLH61</i> | 252        | 28124.63 | 8.86 | 73.21                | nucleus                |
| <i>CtAH08G0016000</i> | <i>CtbHLH62</i> | 261        | 29123.84 | 7.1  | 47.31                | nucleus                |
| <i>CtAH08G0104800</i> | <i>CtbHLH63</i> | 392        | 43630.32 | 6.09 | 57.66                | nucleus                |
| <i>CtAH08G0144200</i> | <i>CtbHLH64</i> | 308        | 33963.01 | 5.86 | 78.17                | nucleus                |
| <i>CtAH08G0151700</i> | <i>CtbHLH65</i> | 387        | 43051.17 | 9.29 | 40.52                | nucleus                |
| <i>CtAH08G0151900</i> | <i>CtbHLH66</i> | 321        | 36144.41 | 9.4  | 53.83                | nucleus                |
| <i>CtAH08G0152100</i> | <i>CtbHLH67</i> | 332        | 36982.17 | 9.07 | 41.03                | nucleus                |
| <i>CtAH08G0152200</i> | <i>CtbHLH68</i> | 328        | 37356.38 | 6.03 | 57.46                | nucleus                |
| <i>CtAH08G0152400</i> | <i>CtbHLH69</i> | 303        | 34166.63 | 5.73 | 56.74                | nucleus                |
| <i>CtAH08G0160000</i> | <i>CtbHLH70</i> | 211        | 24110.44 | 7.78 | 62.23                | nucleus                |
| <i>CtAH08G0181900</i> | <i>CtbHLH71</i> | 240        | 26842.88 | 8.65 | 53.91                | cytosol                |
| <i>CtAH08G0237000</i> | <i>CtbHLH72</i> | 421        | 47405.97 | 5.2  | 55.6                 | nucleus                |
| <i>CtAH09G0014100</i> | <i>CtbHLH73</i> | 437        | 48931.58 | 5.99 | 56.83                | nucleus                |
| <i>CtAH09G0028000</i> | <i>CtbHLH74</i> | 440        | 49469.61 | 8.7  | 52.82                | nucleus                |
| <i>CtAH09G0039600</i> | <i>CtbHLH75</i> | 333        | 37601.28 | 7.02 | 47.48                | nucleus                |
| <i>CtAH09G0067900</i> | <i>CtbHLH76</i> | 365        | 40934.77 | 8.61 | 74                   | nucleus                |
| <i>CtAH09G0072800</i> | <i>CtbHLH77</i> | 603        | 67139.13 | 5.81 | 58.7                 | nucleus                |
| <i>CtAH09G0091200</i> | <i>CtbHLH78</i> | 228        | 25637.09 | 6.38 | 59.48                | nucleus                |
| <i>CtAH09G0091700</i> | <i>CtbHLH79</i> | 269        | 29795.14 | 7.13 | 58.12                | nucleus                |
| <i>CtAH09G0096600</i> | <i>CtbHLH80</i> | 379        | 42457.71 | 5.18 | 51.34                | nucleus                |
| <i>CtAH09G0102800</i> | <i>CtbHLH81</i> | 202        | 22396.12 | 4.94 | 54.62                | chloroplast            |



Table S1. *Cont.*

| Gene Locus            | Gene Name        | protein    |          |      | Instability | Sucellular   |
|-----------------------|------------------|------------|----------|------|-------------|--------------|
|                       |                  | Length(aa) | MW(Da)   | pI   | Index       | Location     |
| <i>CtAH09G0112700</i> | <i>CtbHLH82</i>  | 312        | 34294.77 | 7.05 | 64.73       | nucleus      |
| <i>CtAH09G0118900</i> | <i>CtbHLH83</i>  | 290        | 32993.03 | 5.4  | 56.69       | nucleus      |
| <i>CtAH09G0132000</i> | <i>CtbHLH84</i>  | 217        | 24851.03 | 8.93 | 69.53       | nucleus      |
| <i>CtAH09G0132200</i> | <i>CtbHLH85</i>  | 503        | 53943.14 | 6.09 | 47.8        | nucleus      |
| <i>CtAH09G0142600</i> | <i>CtbHLH86</i>  | 191        | 20719.65 | 6.74 | 47.61       | nucleus      |
| <i>CtAH09G0160300</i> | <i>CtbHLH87</i>  | 167        | 18224.66 | 9.8  | 64.87       | nucleus      |
| <i>CtAH09G0160500</i> | <i>CtbHLH88</i>  | 242        | 26400.44 | 7.83 | 62.5        | nucleus      |
| <i>CtAH09G0161900</i> | <i>CtbHLH89</i>  | 91         | 10409.58 | 6.56 | 79.36       | mitochondria |
| <i>CtAH09G0162200</i> | <i>CtbHLH90</i>  | 96         | 10707.09 | 9.1  | 77.95       | nucleus      |
| <i>CtAH09G0174600</i> | <i>CtbHLH91</i>  | 345        | 38457.98 | 6.9  | 61.44       | nucleus      |
| <i>CtAH09G0192500</i> | <i>CtbHLH92</i>  | 337        | 37534.59 | 4.79 | 60.95       | nucleus      |
| <i>CtAH09G0233200</i> | <i>CtbHLH93</i>  | 316        | 33550.52 | 6.12 | 51.36       | nucleus      |
| <i>CtAH09G0235800</i> | <i>CtbHLH94</i>  | 488        | 54381.4  | 6.85 | 51.53       | nucleus      |
| <i>CtAH09G0248300</i> | <i>CtbHLH95</i>  | 515        | 56316.34 | 5.61 | 66.58       | nucleus      |
| <i>CtAH09G0257900</i> | <i>CtbHLH96</i>  | 474        | 51930.85 | 6.34 | 51          | nucleus      |
| <i>CtAH09G0294100</i> | <i>CtbHLH97</i>  | 361        | 39704.52 | 6.31 | 47.77       | nucleus      |
| <i>CtAH10G0023000</i> | <i>CtbHLH98</i>  | 241        | 27228.02 | 8.86 | 71.7        | chloroplast  |
| <i>CtAH10G0025700</i> | <i>CtbHLH99</i>  | 768        | 86969.85 | 8.55 | 44.1        | cytosol      |
| <i>CtAH10G0025800</i> | <i>CtbHLH100</i> | 295        | 33306.65 | 8.45 | 49.32       | nucleus      |
| <i>CtAH10G0036500</i> | <i>CtbHLH101</i> | 312        | 34562.73 | 5.27 | 61.54       | nucleus      |
| <i>CtAH10G0079000</i> | <i>CtbHLH102</i> | 547        | 59451.14 | 5.61 | 78.63       | nucleus      |
| <i>CtAH10G0094800</i> | <i>CtbHLH103</i> | 605        | 67639.94 | 5.28 | 61.18       | nucleus      |
| <i>CtAH10G0094900</i> | <i>CtbHLH104</i> | 622        | 69042.01 | 5    | 58.66       | nucleus      |
| <i>CtAH10G0095000</i> | <i>CtbHLH105</i> | 603        | 67262.5  | 5.61 | 58.79       | nucleus      |
| <i>CtAH10G0115000</i> | <i>CtbHLH106</i> | 270        | 30465.24 | 5.83 | 47.86       | cytosol      |
| <i>CtAH10G0181500</i> | <i>CtbHLH107</i> | 351        | 38746.55 | 5.53 | 57.16       | nucleus      |
| <i>CtAH10G0208800</i> | <i>CtbHLH108</i> | 289        | 32435.72 | 7.63 | 33.88       | nucleus      |
| <i>CtAH10G0227500</i> | <i>CtbHLH109</i> | 260        | 28902.54 | 5.55 | 39.51       | cytosol      |
| <i>CtAH11G0019900</i> | <i>CtbHLH110</i> | 362        | 41301.55 | 5.92 | 61.35       | nucleus      |
| <i>CtAH11G0020900</i> | <i>CtbHLH111</i> | 323        | 35947.29 | 5.16 | 51.41       | nucleus      |
| <i>CtAH11G0021000</i> | <i>CtbHLH112</i> | 285        | 31697.7  | 5.09 | 43.65       | nucleus      |
| <i>CtAH11G0034700</i> | <i>CtbHLH113</i> | 240        | 26585.87 | 5.33 | 71.12       | nucleus      |
| <i>CtAH11G0035400</i> | <i>CtbHLH114</i> | 228        | 25343.93 | 9.39 | 64.89       | nucleus      |
| <i>CtAH11G0094100</i> | <i>CtbHLH115</i> | 515        | 58133.39 | 7.11 | 54.22       | nucleus      |
| <i>CtAH11G0138700</i> | <i>CtbHLH116</i> | 292        | 31329.72 | 8.84 | 60.82       | nucleus      |
| <i>CtAH11G0244400</i> | <i>CtbHLH117</i> | 398        | 44597.03 | 5.61 | 61.12       | nucleus      |
| <i>CtAH11G0257000</i> | <i>CtbHLH118</i> | 513        | 56397.27 | 6.15 | 46.6        | nucleus      |
| <i>CtAH12G0137000</i> | <i>CtbHLH119</i> | 339        | 35179.14 | 5.76 | 60.36       | nucleus      |
| <i>CtAH12G0153400</i> | <i>CtbHLH120</i> | 253        | 29178.37 | 9.19 | 51.69       | nucleus      |

**Table S2.** String interaction analysis of *CtbHLH* gene family

| #node1    | node2     | node1_string_id | node2_string_id | coexpression | combined_score |
|-----------|-----------|-----------------|-----------------|--------------|----------------|
| CtbHLH04  | CtbHLH92  | AT1G66470.1     | AT4G33880.1     | 0.406        | 0.568          |
| CtbHLH04  | CtbHLH39  | AT1G66470.1     | AT2G24260.1     | 0.181        | 0.405          |
| CtbHLH04  | CtbHLH89  | AT1G66470.1     | AT1G74500.1     | 0.447        | 0.497          |
| CtbHLH04  | CtbHLH32  | AT1G66470.1     | AT4G29930.3     | 0.171        | 0.408          |
| CtbHLH04  | CtbHLH05  | AT1G66470.1     | AT1G63650.3     | 0            | 0.63           |
| CtbHLH05  | CtbHLH92  | AT1G63650.3     | AT4G33880.1     | 0            | 0.548          |
| CtbHLH08  | CtbHLH31  | AT1G10610.1     | AT1G25330.1     | 0            | 0.457          |
| CtbHLH08  | CtbHLH114 | AT1G10610.1     | AT5G67060.1     | 0            | 0.61           |
| CtbHLH08  | CtbHLH78  | AT1G10610.1     | AT3G50330.1     | 0            | 0.61           |
| CtbHLH10  | CtbHLH57  | AT1G26945.1     | AT1G18400.1     | 0.111        | 0.503          |
| CtbHLH10  | CtbHLH33  | AT1G26945.1     | AT1G09530.2     | 0            | 0.543          |
| CtbHLH04  | CtbHLH92  | AT1G66470.1     | AT4G33880.1     | 0.406        | 0.568          |
| CtbHLH10  | CtbHLH48  | AT1G26945.1     | AT1G68920.1     | 0            | 0.587          |
| CtbHLH100 | CtbHLH41  | AT3G56970.1     | AT2G28160.1     | 0            | 0.977          |

**Table S2. Cont.**

| #node1    | node2     | node1_string_id | node2_string_id | coexpression | combined_score |
|-----------|-----------|-----------------|-----------------|--------------|----------------|
| CtbHLH100 | CtbHLH99  | AT3G56970.1     | AT3G56980.1     | 0.487        | 0.498          |
| CtbHLH100 | CtbHLH82  | AT3G56970.1     | AT1G22490.1     | 0            | 0.532          |
| CtbHLH100 | CtbHLH76  | AT3G56970.1     | AT4G00050.1     | 0            | 0.453          |
| CtbHLH100 | CtbHLH84  | AT3G56970.1     | AT5G50915.1     | 0            | 0.591          |
| CtbHLH100 | CtbHLH69  | AT3G56970.1     | AT4G37850.1     | 0            | 0.594          |
| CtbHLH100 | CtbHLH20  | AT3G56970.1     | AT4G14410.1     | 0            | 0.914          |
| CtbHLH100 | CtbHLH86  | AT3G56970.1     | AT5G54680.1     | 0            | 0.929          |
| CtbHLH101 | CtbHLH71  | AT2G42300.1     | AT1G68810.1     | 0            | 0.584          |
| CtbHLH101 | CtbHLH98  | AT2G42300.1     | AT2G41130.1     | 0            | 0.6            |
| CtbHLH101 | CtbHLH94  | AT2G42300.1     | AT4G16430.1     | 0            | 0.598          |
| CtbHLH101 | CtbHLH74  | AT2G42300.1     | AT5G51780.1     | 0            | 0.615          |
| CtbHLH101 | CtbHLH83  | AT2G42300.1     | AT5G65640.1     | 0            | 0.626          |
| CtbHLH101 | CtbHLH40  | AT2G42300.1     | AT5G56960.1     | 0            | 0.695          |
| CtbHLH105 | CtbHLH84  | AT4G09820.1     | AT5G50915.1     | 0            | 0.494          |
| CtbHLH108 | CtbHLH91  | AT2G40200.1     | AT1G69010.1     | 0            | 0.627          |
| CtbHLH108 | CtbHLH34  | AT2G40200.1     | AT2G14760.3     | 0            | 0.543          |
| CtbHLH108 | CtbHLH78  | AT2G40200.1     | AT3G50330.1     | 0            | 0.429          |
| CtbHLH108 | CtbHLH96  | AT2G40200.1     | AT3G07340.1     | 0            | 0.463          |
| CtbHLH108 | CtbHLH69  | AT2G40200.1     | AT4G37850.1     | 0            | 0.497          |
| CtbHLH108 | CtbHLH36  | AT2G40200.1     | AT4G34530.1     | 0            | 0.514          |
| CtbHLH108 | CtbHLH93  | AT2G40200.1     | AT4G02590.1     | 0            | 0.519          |
| CtbHLH108 | CtbHLH21  | AT2G40200.1     | AT5G46690.1     | 0            | 0.615          |
| CtbHLH108 | CtbHLH109 | AT2G40200.1     | AT5G51790.1     | 0            | 0.616          |
| CtbHLH108 | CtbHLH92  | AT2G40200.1     | AT4G33880.1     | 0            | 0.619          |
| CtbHLH108 | CtbHLH86  | AT2G40200.1     | AT5G54680.1     | 0            | 0.62           |
| CtbHLH108 | CtbHLH114 | AT2G40200.1     | AT5G67060.1     | 0            | 0.637          |

Table S2. *Cont.*

| #node1   | node2    | node1_string_id | node2_string_id | coexpression | combined_score |
|----------|----------|-----------------|-----------------|--------------|----------------|
| CtbHLH21 | CtbHLH95 | AT5G46690.1     | AT2G20180.2     | 0.115        | 0              |
| CtbHLH21 | CtbHLH76 | AT5G46690.1     | AT4G00050.1     | 0.06         | 0              |
| CtbHLH21 | CtbHLH33 | AT5G46690.1     | AT1G09530.2     | 0            | 0              |
| CtbHLH21 | CtbHLH49 | AT5G46690.1     | AT1G35460.1     | 0            | 0              |
| CtbHLH21 | CtbHLH88 | AT5G46690.1     | AT1G59640.2     | 0            | 0              |
| CtbHLH21 | CtbHLH91 | AT5G46690.1     | AT1G69010.1     | 0            | 0              |
| CtbHLH21 | CtbHLH34 | AT5G46690.1     | AT2G14760.3     | 0            | 0              |
| CtbHLH21 | CtbHLH39 | AT5G46690.1     | AT2G24260.1     | 0            | 0              |
| CtbHLH21 | CtbHLH97 | AT5G46690.1     | AT2G42280.1     | 0            | 0              |
| CtbHLH21 | CtbHLH78 | AT5G46690.1     | AT3G50330.1     | 0            | 0              |
| CtbHLH21 | CtbHLH94 | AT5G46690.1     | AT4G16430.1     | 0            | 0              |
| CtbHLH21 | CtbHLH92 | AT5G46690.1     | AT4G33880.1     | 0            | 0              |
| CtbHLH21 | CtbHLH36 | AT5G46690.1     | AT4G34530.1     | 0            | 0              |
| CtbHLH21 | CtbHLH77 | AT5G46690.1     | AT5G08130.5     | 0            | 0              |
| CtbHLH21 | CtbHLH54 | AT5G46690.1     | AT5G62610.1     | 0            | 0              |
| CtbHLH22 | CtbHLH84 | AT1G32640.1     | AT5G50915.1     | 0            | 0              |
| CtbHLH24 | CtbHLH88 | AT3G19860.2     | AT1G59640.2     | 0            | 0              |
| CtbHLH24 | CtbHLH98 | AT3G19860.2     | AT2G41130.1     | 0            | 0              |
| CtbHLH24 | CtbHLH54 | AT3G19860.2     | AT5G62610.1     | 0            | 0              |
| CtbHLH24 | CtbHLH36 | AT3G19860.2     | AT4G34530.1     | 0            | 0              |
| CtbHLH26 | CtbHLH96 | AT4G20970.1     | AT3G07340.1     | 0            | 0              |
| CtbHLH26 | CtbHLH60 | AT4G20970.1     | AT5G53210.1     | 0            | 0              |
| CtbHLH29 | CtbHLH71 | AT2G31220.1     | AT1G68810.1     | 0            | 0.115          |
| CtbHLH29 | CtbHLH37 | AT2G31220.1     | AT2G16910.1     | 0            | 0              |
| CtbHLH29 | CtbHLH77 | AT2G31220.1     | AT5G08130.5     | 0            | 0              |
| CtbHLH29 | CtbHLH40 | AT2G31220.1     | AT5G56960.1     | 0            | 0              |
| CtbHLH31 | CtbHLH57 | AT1G25330.1     | AT1G18400.1     | 0            | 0.597          |
| CtbHLH32 | CtbHLH69 | AT4G29930.3     | AT4G37850.1     | 0.047        | 0.49           |
| CtbHLH32 | CtbHLH36 | AT4G29930.3     | AT4G34530.1     | 0            | 0.115          |
| CtbHLH32 | CtbHLH92 | AT4G29930.3     | AT4G33880.1     | 0.118        | 0              |
| CtbHLH32 | CtbHLH82 | AT4G29930.3     | AT1G22490.1     | 0.086        | 0              |
| CtbHLH32 | CtbHLH39 | AT4G29930.3     | AT2G24260.1     | 0.074        | 0              |
| CtbHLH32 | CtbHLH34 | AT4G29930.3     | AT2G14760.3     | 0.059        | 0              |
| CtbHLH32 | CtbHLH91 | AT4G29930.3     | AT1G69010.1     | 0.058        | 0              |
| CtbHLH32 | CtbHLH78 | AT4G29930.3     | AT3G50330.1     | 0            | 0              |
| CtbHLH32 | CtbHLH84 | AT4G29930.3     | AT5G50915.1     | 0            | 0              |
| CtbHLH33 | CtbHLH95 | AT1G09530.2     | AT2G20180.2     | 0            | 0.501          |
| CtbHLH33 | CtbHLH38 | AT1G09530.2     | AT3G06120.1     | 0            | 0              |
| CtbHLH33 | CtbHLH60 | AT1G09530.2     | AT5G53210.1     | 0            | 0              |
| CtbHLH34 | CtbHLH71 | AT2G14760.3     | AT1G68810.1     | 0            | 0              |
| CtbHLH34 | CtbHLH90 | AT2G14760.3     | AT3G28857.1     | 0            | 0              |



Table S2. *Cont.*

| #node1   | node2    | node1_string_id | node2_string_id | coexpression | combined_score |
|----------|----------|-----------------|-----------------|--------------|----------------|
| CtbHLH34 | CtbHLH86 | AT2G14760.3     | AT5G54680.1     | 0            | 0              |
| CtbHLH36 | CtbHLH96 | AT4G34530.1     | AT3G07340.1     | 0            | 0.499          |
| CtbHLH36 | CtbHLH98 | AT4G34530.1     | AT2G41130.1     | 0            | 0              |
| CtbHLH36 | CtbHLH60 | AT4G34530.1     | AT5G53210.1     | 0            | 0              |
| CtbHLH36 | CtbHLH69 | AT4G34530.1     | AT4G37850.1     | 0            | 0              |
| CtbHLH38 | CtbHLH85 | AT3G06120.1     | AT3G26744.1     | 0.08         | 0.5            |
| CtbHLH38 | CtbHLH76 | AT3G06120.1     | AT4G00050.1     | 0            | 0              |
| CtbHLH38 | CtbHLH83 | AT3G06120.1     | AT5G65640.1     | 0            | 0              |
| CtbHLH38 | CtbHLH84 | AT3G06120.1     | AT5G50915.1     | 0            | 0              |
| CtbHLH40 | CtbHLH71 | AT5G56960.1     | AT1G68810.1     | 0            | 0              |
| CtbHLH40 | CtbHLH41 | AT5G56960.1     | AT2G28160.1     | 0            | 0              |
| CtbHLH40 | CtbHLH98 | AT5G56960.1     | AT2G41130.1     | 0            | 0              |
| CtbHLH40 | CtbHLH79 | AT5G56960.1     | AT4G36930.1     | 0            | 0              |
| CtbHLH40 | CtbHLH84 | AT5G56960.1     | AT5G50915.1     | 0            | 0              |
| CtbHLH40 | CtbHLH74 | AT5G56960.1     | AT5G51780.1     | 0            | 0              |
| CtbHLH40 | CtbHLH83 | AT5G56960.1     | AT5G65640.1     | 0            | 0              |
| CtbHLH40 | CtbHLH54 | AT5G56960.1     | AT5G62610.1     | 0            | 0              |
| CtbHLH41 | CtbHLH99 | AT2G28160.1     | AT3G56980.1     | 0            | 0.605          |
| CtbHLH41 | CtbHLH90 | AT2G28160.1     | AT3G28857.1     | 0            | 0              |
| CtbHLH41 | CtbHLH86 | AT2G28160.1     | AT5G54680.1     | 0            | 0              |
| CtbHLH46 | CtbHLH94 | AT2G34820.1     | AT4G16430.1     | 0            | 0              |
| CtbHLH48 | CtbHLH71 | AT1G68920.1     | AT1G68810.1     | 0            | 0              |
| CtbHLH48 | CtbHLH77 | AT1G68920.1     | AT5G08130.5     | 0            | 0              |
| CtbHLH48 | CtbHLH69 | AT1G68920.1     | AT4G37850.1     | 0            | 0              |
| CtbHLH48 | CtbHLH89 | AT1G68920.1     | AT1G74500.1     | 0            | 0              |
| CtbHLH54 | CtbHLH71 | AT5G62610.1     | AT1G68810.1     | 0            | 0              |
| CtbHLH54 | CtbHLH98 | AT5G62610.1     | AT2G41130.1     | 0            | 0              |
| CtbHLH54 | CtbHLH94 | AT5G62610.1     | AT4G16430.1     | 0            | 0              |
| CtbHLH54 | CtbHLH74 | AT5G62610.1     | AT5G51780.1     | 0            | 0              |
| CtbHLH54 | CtbHLH60 | AT5G62610.1     | AT5G53210.1     | 0            | 0              |
| CtbHLH54 | CtbHLH83 | AT5G62610.1     | AT5G65640.1     | 0            | 0              |
| CtbHLH57 | CtbHLH83 | AT1G18400.1     | AT5G65640.1     | 0            | 0              |
| CtbHLH57 | CtbHLH86 | AT1G18400.1     | AT5G54680.1     | 0            | 0              |
| CtbHLH57 | CtbHLH77 | AT1G18400.1     | AT5G08130.5     | 0            | 0              |
| CtbHLH60 | CtbHLH85 | AT5G53210.1     | AT3G26744.1     | 0.087        | 0.5            |
| CtbHLH60 | CtbHLH76 | AT5G53210.1     | AT4G00050.1     | 0.058        | 0              |
| CtbHLH60 | CtbHLH88 | AT5G53210.1     | AT1G59640.2     | 0            | 0              |
| CtbHLH60 | CtbHLH96 | AT5G53210.1     | AT3G07340.1     | 0            | 0              |
| CtbHLH60 | CtbHLH99 | AT5G53210.1     | AT3G56980.1     | 0            | 0              |
| CtbHLH60 | CtbHLH84 | AT5G53210.1     | AT5G50915.1     | 0            | 0              |
| CtbHLH60 | CtbHLH83 | AT5G53210.1     | AT5G65640.1     | 0            | 0              |

Table S2. *Cont.*

| #node1   | node2    | node1_string_id | node2_string_id | coexpression | combined_score |
|----------|----------|-----------------|-----------------|--------------|----------------|
| CtbHLH69 | CtbHLH99 | AT4G37850.1     | AT3G56980.1     | 0            | 0              |
| CtbHLH69 | CtbHLH93 | AT4G37850.1     | AT4G02590.1     | 0            | 0              |
| CtbHLH69 | CtbHLH86 | AT4G37850.1     | AT5G54680.1     | 0            | 0              |
| CtbHLH71 | CtbHLH84 | AT1G68810.1     | AT5G50915.1     | 0            | 0              |
| CtbHLH71 | CtbHLH74 | AT1G68810.1     | AT5G51780.1     | 0            | 0              |
| CtbHLH71 | CtbHLH91 | AT1G68810.1     | AT1G69010.1     | 0            | 0              |
| CtbHLH72 | CtbHLH83 | AT3G24140.1     | AT5G65640.1     | 0            | 0.759          |
| CtbHLH72 | CtbHLH85 | AT3G24140.1     | AT3G26744.1     | 0.087        | 0.5            |
| CtbHLH74 | CtbHLH84 | AT5G51780.1     | AT5G50915.1     | 0            | 0.115          |
| CtbHLH74 | CtbHLH89 | AT5G51780.1     | AT1G74500.1     | 0.212        | 0              |
| CtbHLH74 | CtbHLH82 | AT5G51780.1     | AT1G22490.1     | 0            | 0              |
| CtbHLH74 | CtbHLH98 | AT5G51780.1     | AT2G41130.1     | 0            | 0              |
| CtbHLH74 | CtbHLH83 | AT5G51780.1     | AT5G65640.1     | 0            | 0              |
| CtbHLH76 | CtbHLH86 | AT4G00050.1     | AT5G54680.1     | 0            | 0              |
| CtbHLH77 | CtbHLH91 | AT5G08130.5     | AT1G69010.1     | 0.069        | 0.491          |
| CtbHLH77 | CtbHLH89 | AT5G08130.5     | AT1G74500.1     | 0            | 0              |
| CtbHLH77 | CtbHLH94 | AT5G08130.5     | AT4G16430.1     | 0            | 0              |
| CtbHLH77 | CtbHLH86 | AT5G08130.5     | AT5G54680.1     | 0            | 0              |
| CtbHLH78 | CtbHLH79 | AT3G50330.1     | AT4G36930.1     | 0.073        | 0.5            |
| CtbHLH82 | CtbHLH84 | AT1G22490.1     | AT5G50915.1     | 0            | 0              |
| CtbHLH83 | CtbHLH98 | AT5G65640.1     | AT2G41130.1     | 0            | 0              |
| CtbHLH83 | CtbHLH97 | AT5G65640.1     | AT2G42280.1     | 0            | 0              |
| CtbHLH83 | CtbHLH84 | AT5G65640.1     | AT5G50915.1     | 0            | 0              |
| CtbHLH84 | CtbHLH98 | AT5G50915.1     | AT2G41130.1     | 0            | 0              |
| CtbHLH84 | CtbHLH85 | AT5G50915.1     | AT3G26744.1     | 0            | 0              |
| CtbHLH84 | CtbHLH90 | AT5G50915.1     | AT3G28857.1     | 0            | 0              |
| CtbHLH84 | CtbHLH99 | AT5G50915.1     | AT3G56980.1     | 0            | 0              |
| CtbHLH85 | CtbHLH86 | AT3G26744.1     | AT5G54680.1     | 0            | 0              |
| CtbHLH86 | CtbHLH91 | AT5G54680.1     | AT1G69010.1     | 0            | 0              |
| CtbHLH86 | CtbHLH99 | AT5G54680.1     | AT3G56980.1     | 0            | 0              |
| CtbHLH86 | CtbHLH93 | AT5G54680.1     | AT4G02590.1     | 0            | 0              |
| CtbHLH89 | CtbHLH97 | AT1G74500.1     | AT2G42280.1     | 0            | 0              |

**Table S3.** The FPKM values of *CtbHLHs*

| Gene     | White | Yellow | LightRed | DeepRed | 1DAG   | 3DAG  | 5DAG  | 7DAG  | 10DAG | DAF0   | DAF10 | DAF20 | HL_DAF10 | HL_DAF20 | LL_DAF10 | LL_DAF20 | SBS    | MBS   | IFS   | PFS   | DFS    |
|----------|-------|--------|----------|---------|--------|-------|-------|-------|-------|--------|-------|-------|----------|----------|----------|----------|--------|-------|-------|-------|--------|
| CtbHLH01 | 7.86  | 7.76   | 5.61     | 6.33    | 18.16  | 6.39  | 5.52  | 7.91  | 11.42 | 8.74   | 7.72  | 9.02  | 8.79     | 7.63     | 12.85    | 3.81     | 7.08   | 7.39  | 8.13  | 6.54  | 7.11   |
| CtbHLH02 | 0.43  | 5.47   | 1.10     | 0.81    | 123.68 | 31.19 | 13.8  | 5.82  | 3.33  | 11.83  | 2.07  | 4.96  | 2.11     | 3.1      | 3.38     | 0.06     | 29.99  | 31.85 | 16.31 | 9.27  | 8.14   |
| CtbHLH03 | 0.04  | 0.19   | 0.1      | 0.05    | 8.8    | 5.82  | 6.68  | 8.72  | 11.02 | 3.94   | 2.77  | 0.51  | 3.3      | 2.2      | 1.09     | 0.39     | 2.16   | 1.52  | 1.6   | 0.56  | 0.95   |
| CtbHLH04 | 0     | 0      | 0        | 0       | 1.45   | 0.52  | 0.29  | 0.21  | 0.02  | 0      | 0.23  | 0.47  | 0.24     | 0.42     | 0.03     | 0.5      | 0      | 0     | 0     | 0     | 0      |
| CtbHLH05 | 0.05  | 0.41   | 0.14     | 1.95    | 0.09   | 0.45  | 0.73  | 2.81  | 2.03  | 3.19   | 0.3   | 0.29  | 3.52     | 0.54     | 1.93     | 0.08     | 3.89   | 3.2   | 1.75  | 1.26  | 0.62   |
| CtbHLH06 | 36.81 | 65.37  | 88.88    | 64.49   | 8.98   | 13.02 | 15.84 | 8.54  | 36.63 | 282.18 | 13.63 | 8.92  | 21.14    | 12.04    | 30.88    | 4.58     | 36.77  | 29.85 | 92.82 | 84.63 | 226.45 |
| CtbHLH07 | 0.05  | 0      | 0.08     | 0.04    | 51.96  | 35.82 | 48.47 | 6.91  | 9.29  | 94.85  | 25    | 8.16  | 28.13    | 18.25    | 34.87    | 6.97     | 34.99  | 31.42 | 33.43 | 0.04  | 6.65   |
| CtbHLH08 | 0.01  | 0      | 0        | 0       | 1.49   | 7.14  | 4.45  | 2.52  | 0.58  | 3.01   | 0.69  | 0.68  | 0.63     | 0.59     | 0.85     | 0.14     | 2.09   | 1.76  | 1.08  | 0.13  | 0.11   |
| CtbHLH09 | 4.95  | 9.37   | 8.07     | 54.89   | 28.31  | 17.74 | 14.47 | 26.22 | 23.1  | 50.91  | 5.11  | 26.84 | 6.44     | 7.8      | 9.26     | 6.99     | 153.25 | 324.8 | 70.72 | 14.45 | 19.49  |
| CtbHLH10 | 0.09  | 0.48   | 5.5      | 0.65    | 0      | 0.02  | 2.01  | 1.45  | 3.79  | 1.01   | 0     | 0     | 0        | 0        | 0        | 0        | 31.12  | 9.16  | 0.52  | 0.55  | 0.04   |
| CtbHLH11 | 0.04  | 0.03   | 0        | 0.02    | 16.6   | 0.07  | 0.07  | 0.08  | 0.01  | 0      | 0     | 4.94  | 0.02     | 0.65     | 0        | 0.04     | 0      | 0     | 0     | 0     | 0      |
| CtbHLH12 | 0     | 0      | 0        | 0       | 0.04   | 0.11  | 0.13  | 0.06  | 0     | 0      | 1.75  | 0.2   | 0.89     | 0.72     | 0        | 0.12     | 0.02   | 0.05  | 0.03  | 0     | 0      |
| CtbHLH13 | 10.28 | 16.07  | 13.9     | 7.32    | 0.02   | 0     | 0     | 0.26  | 0     | 0.13   | 0     | 0     | 0.01     | 0        | 0.03     | 0        | 2.73   | 4     | 3.4   | 15.74 | 1.56   |
| CtbHLH14 | 0     | 0.02   | 0.04     | 0       | 0.32   | 4.36  | 5.02  | 4.1   | 4.6   | 1.01   | 2.25  | 0.26  | 1.64     | 1.44     | 1.06     | 0.89     | 2.24   | 1.7   | 0.45  | 0.08  | 0.04   |
| CtbHLH15 | 2.43  | 2.79   | 1.82     | 3.54    | 7.2    | 2.6   | 3.04  | 3.34  | 14.11 | 7.27   | 1.98  | 3.03  | 4.72     | 2.96     | 3.25     | 1.65     | 4.5    | 4.33  | 4.83  | 4.62  | 3.51   |
| CtbHLH16 | 0.33  | 0.05   | 0.19     | 0.19    | 0.13   | 6.44  | 27.5  | 22.03 | 21.87 | 2.79   | 0     | 0     | 0        | 0        | 0        | 0        | 2.9    | 2     | 1.62  | 1.17  | 0.51   |
| CtbHLH17 | 0.50  | 0.51   | 0.61     | 0.32    | 0.34   | 0.89  | 1.36  | 1.1   | 0.96  | 0.38   | 0.06  | 0.16  | 0.09     | 0.2      | 0.13     | 0.02     | 0.11   | 0.09  | 0.29  | 1.04  | 0.23   |
| CtbHLH18 | 0.00  | 0.00   | 0.00     | 0.00    | 0      | 0     | 0     | 0     | 0     | 0.02   | 0.01  | 0.03  | 0.09     | 0.05     | 0.12     | 0        | 0.09   | 0.02  | 0     | 0.02  | 0      |
| CtbHLH19 | 53.19 | 46.94  | 34.31    | 27.34   | 0.05   | 1.04  | 7.68  | 6.24  | 26.58 | 0.06   | 0.34  | 0.69  | 0.38     | 0.46     | 0.28     | 0.25     | 0.69   | 2.55  | 9.84  | 36.29 | 1.85   |
| CtbHLH20 | 13.51 | 14.69  | 13.82    | 13.81   | 23.53  | 17.8  | 17.39 | 21.6  | 25.52 | 24.03  | 4.43  | 2.29  | 7.75     | 4.7      | 12.83    | 2.3      | 18.69  | 21.73 | 19.38 | 16.24 | 23.56  |
| CtbHLH21 | 0.02  | 0      | 0.02     | 0       | 0.01   | 3.46  | 4.34  | 1.77  | 0.9   | 1.49   | 0.88  | 0.01  | 2.89     | 0.13     | 3.29     | 0.04     | 8.27   | 2.76  | 1.63  | 0.02  | 0.02   |
| CtbHLH22 | 0.64  | 1.44   | 2.69     | 0.53    | 0.76   | 0.04  | 0.1   | 0.09  | 0.04  | 79.96  | 0.1   | 1.5   | 0.45     | 0.16     | 3.98     | 0.02     | 34.93  | 14.45 | 29.56 | 8.42  | 162.4  |
| CtbHLH23 | 43.11 | 66.67  | 73.67    | 112.47  | 118.28 | 33.64 | 22.29 | 37.23 | 49.26 | 28.55  | 18.27 | 42.05 | 26.96    | 32.26    | 37.32    | 21.17    | 40.3   | 31.16 | 37.56 | 60.24 | 132.7  |

Table S3. *Cont.*

| Gene     | White  | Yellow | LightRred | DeepRred | 1DAG  | 3DAG  | 5DAG  | 7DAG  | 10DAG | DAF0  | DAF10 | DAF20 | HL_DAF10 | HL_DAF20 | LL_DAF10 | LL_DAF20 | SBS   | MBS   | IFS   | PFS    | DFS   |
|----------|--------|--------|-----------|----------|-------|-------|-------|-------|-------|-------|-------|-------|----------|----------|----------|----------|-------|-------|-------|--------|-------|
| CtbHLH24 | 12.1   | 11     | 6.03      | 16.01    | 10.54 | 4.67  | 4.75  | 3.39  | 8.94  | 5.64  | 2.5   | 4.98  | 2.74     | 2.58     | 3.12     | 3.7      | 5.03  | 3.65  | 4.2   | 5.2    | 13.17 |
| CtbHLH25 | 0.55   | 0.53   | 0.13      | 0.22     | 2.37  | 8.07  | 8.44  | 7.39  | 11.08 | 3.48  | 4.16  | 4.91  | 5.15     | 4.67     | 1.7      | 1.59     | 3.32  | 2.02  | 2.14  | 1.97   | 1.96  |
| CtbHLH26 | 0.04   | 0.04   | 0         | 0        | 0.02  | 8.87  | 24.61 | 4.18  | 16.23 | 0     | 0.03  | 0     | 0.04     | 0        | 0.19     | 0        | 0.78  | 0.03  | 0.06  | 0.16   | 0     |
| CtbHLH27 | 0.71   | 1.59   | 2.74      | 1.91     | 0.16  | 1.77  | 3.53  | 4.93  | 12.12 | 0.44  | 0.25  | 2.32  | 0.44     | 1.76     | 0.57     | 1.09     | 0.7   | 0.26  | 0.48  | 1.67   | 0.23  |
| CtbHLH28 | 20.88  | 17.12  | 30.33     | 14.75    | 83.54 | 9.88  | 9.69  | 18.49 | 25.24 | 1.15  | 1.44  | 16.21 | 1.08     | 6.65     | 0.32     | 1.52     | 1.29  | 1.26  | 3.6   | 8.64   | 18.2  |
| CtbHLH29 | 0.82   | 0.5    | 0.34      | 0.25     | 0.18  | 0.52  | 1.4   | 0.57  | 1.78  | 0.53  | 0.23  | 0.3   | 0.45     | 0.52     | 0.91     | 0.24     | 0.59  | 0.6   | 0.32  | 0.08   | 0.02  |
| CtbHLH30 | 0.47   | 0.37   | 0.76      | 0.48     | 2.23  | 3.86  | 4.44  | 6.17  | 2.56  | 1.56  | 2.92  | 0.52  | 2.91     | 1.64     | 2.56     | 2.01     | 2.54  | 0.65  | 0.54  | 0.63   | 0.22  |
| CtbHLH31 | 10.85  | 21.36  | 24.08     | 6.18     | 0     | 0     | 0     | 0     | 0     | 5.3   | 0     | 0.01  | 0        | 0        | 0.01     | 0        | 4     | 5.94  | 12.66 | 20.78  | 0.88  |
| CtbHLH32 | 4.56   | 3.32   | 0.59      | 0.73     | 1.3   | 4.81  | 5.95  | 3.88  | 10.24 | 1.64  | 0.08  | 0.11  | 0.14     | 0.07     | 1.21     | 0.24     | 3.45  | 2.42  | 1.27  | 2.15   | 0.98  |
| CtbHLH33 | 3.34   | 3.56   | 3.24      | 1.77     | 18.66 | 15.15 | 18.55 | 10.48 | 23.76 | 21.36 | 1.95  | 2.51  | 3.9      | 2.2      | 4.88     | 1.59     | 25.13 | 32.08 | 18.27 | 5.92   | 23.56 |
| CtbHLH34 | 1.97   | 2.29   | 2.01      | 2.58     | 1.67  | 3.2   | 3.1   | 3     | 9.04  | 4.45  | 1.86  | 2.63  | 3.16     | 2.51     | 2.85     | 2.08     | 3.65  | 3.61  | 1.99  | 2.19   | 2.17  |
| CtbHLH35 | 0      | 0      | 0         | 0        | 1.73  | 0     | 0     | 0.02  | 0     | 0.51  | 0.33  | 0.03  | 0.59     | 0.05     | 2.64     | 0.07     | 0.2   | 0.23  | 0.24  | 0.05   | 0     |
| CtbHLH36 | 6.19   | 5.04   | 15.03     | 6.72     | 10.5  | 14.47 | 22.03 | 18.56 | 57.08 | 19.19 | 0.31  | 0.18  | 0.33     | 0.08     | 1.09     | 0.12     | 7.14  | 14.9  | 21.23 | 9.98   | 38.27 |
| CtbHLH37 | 0      | 0.01   | 0.01      | 0        | 0.01  | 0.01  | 0     | 0     | 0     | 0     | 0.01  | 0.03  | 0.01     | 0.01     | 0        | 0.01     | 6.93  | 0     | 0     | 0      | 0.07  |
| CtbHLH38 | 0      | 0.01   | 0.01      | 0        | 0.26  | 3.01  | 2.95  | 0.02  | 0     | 0.05  | 0.31  | 0.14  | 0.11     | 0.29     | 0.22     | 0.07     | 0.07  | 0     | 0     | 0      | 0     |
| CtbHLH39 | 0.64   | 3.47   | 0.51      | 1.3      | 0.47  | 3.21  | 3.75  | 9.01  | 2.1   | 2.69  | 1.32  | 0.47  | 22.38    | 9.44     | 44.41    | 5.26     | 6.27  | 3.72  | 2.65  | 2.74   | 4.46  |
| CtbHLH40 | 0      | 0.02   | 0         | 0        | 0     | 0     | 0     | 0     | 0.06  | 0     | 0     | 0     | 0        | 0        | 0        | 0        | 0     | 0     | 0     | 0.01   | 0.07  |
| CtbHLH41 | 2.01   | 0      | 1.69      | 0.33     | 0.46  | 0.65  | 3.06  | 4.36  | 1.17  | 0.59  | 0.27  | 1.69  | 0.14     | 0.12     | 0.1      | 0.1      | 0.63  | 0.68  | 1.09  | 1.57   | 0.2   |
| CtbHLH42 | 111.02 | 81.65  | 80.39     | 50.09    | 10.05 | 15.39 | 21.57 | 16.06 | 61.83 | 58.52 | 1.02  | 1.37  | 3.62     | 2.48     | 5.91     | 1.1      | 22.49 | 25.62 | 83.19 | 113.93 | 38.81 |
| CtbHLH43 | 7.31   | 10.59  | 22.47     | 13.36    | 17.62 | 2.11  | 2.09  | 5.25  | 4.35  | 1.81  | 0.15  | 0.39  | 0.68     | 0.41     | 0.84     | 0.05     | 0.3   | 0.3   | 0.91  | 2.18   | 29.52 |
| CtbHLH44 | 3.82   | 3.49   | 2.03      | 0.62     | 1.3   | 0.3   | 9.02  | 1.05  | 16.28 | 1.05  | 0.31  | 8.72  | 0.26     | 3.77     | 0.04     | 1.15     | 0.29  | 0.83  | 1.04  | 2.2    | 8.87  |
| CtbHLH45 | 0      | 0.11   | 0.08      | 0.05     | 18.54 | 2.39  | 2.61  | 1.44  | 0.56  | 0.01  | 0.28  | 0.33  | 0.32     | 0.28     | 0.26     | 0.08     | 0.5   | 0.01  | 0.02  | 0      | 0.07  |
| CtbHLH46 | 0      | 0      | 0         | 0        | 0     | 0.01  | 0     | 0.09  | 0     | 0.06  | 0     | 0     | 0        | 0.01     | 0        | 0        | 0.21  | 0.02  | 0.02  | 0      | 0.05  |

Table S3. *Cont.*

| Gene     | White | Yellow | LightRed | DeepRed | 1DAG  | 3DAG  | 5DAG  | 7DAG  | 10DAG | DAF0  | DAF10 | DAF20 | HL_DAF10 | HL_DAF20 | LL_DAF10 | LL_DAF20 | SBS   | MBS    | IFS   | PFS   | DFS   |
|----------|-------|--------|----------|---------|-------|-------|-------|-------|-------|-------|-------|-------|----------|----------|----------|----------|-------|--------|-------|-------|-------|
| CtbHLH47 | 6.2   | 4.47   | 4.07     | 7.94    | 8.32  | 10.84 | 8.08  | 1.41  | 3.13  | 45.9  | 35.98 | 17.6  | 55.79    | 31.91    | 66.65    | 12.23    | 29.57 | 24.7   | 20.49 | 5.91  | 10.47 |
| CtbHLH48 | 0.45  | 0.35   | 0.12     | 0.59    | 1.86  | 3.1   | 3.27  | 2.39  | 2.08  | 2.51  | 0.06  | 0.14  | 0.16     | 0.14     | 0.3      | 0.15     | 1.23  | 1.16   | 1.12  | 0.49  | 0.21  |
| CtbHLH49 | 3.71  | 7.21   | 5.25     | 9.53    | 41.74 | 4.28  | 4.91  | 4.65  | 13.08 | 7.64  | 3.77  | 60.47 | 3.99     | 8.03     | 3.85     | 7.7      | 6.6   | 6.74   | 8.76  | 9.93  | 19.27 |
| CtbHLH50 | 0     | 0      | 0        | 0       | 0.27  | 0.5   | 0.48  | 0.85  | 0.15  | 0     | 0     | 0     | 0        | 0        | 0.06     | 0.01     | 0     | 0      | 0     | 0     | 0     |
| CtbHLH51 | 36.37 | 31.16  | 36.88    | 15.2    | 14.35 | 5.4   | 9     | 8.41  | 31    | 33.01 | 2.01  | 2.01  | 4.32     | 3.08     | 5.69     | 2.91     | 17.42 | 23.98  | 21.65 | 14.3  | 12.05 |
| CtbHLH52 | 0     | 0      | 0        | 0       | 0.1   | 0     | 0     | 0.06  | 0.02  | 2.13  | 0.04  | 0     | 0.06     | 0.03     | 0        | 0        | 0.22  | 0.2    | 5.17  | 0     | 0     |
| CtbHLH53 | 7.66  | 3.93   | 2.39     | 0.28    | 0.02  | 0     | 0.02  | 0.02  | 0     | 0.06  | 0     | 0     | 0        | 0        | 0        | 0        | 0.15  | 0.29   | 1.55  | 0.56  | 0     |
| CtbHLH54 | 86.07 | 52.72  | 84.45    | 79.96   | 3.44  | 4.63  | 2.92  | 0.93  | 1.03  | 20.16 | 1.08  | 2.51  | 1.85     | 1.11     | 5.03     | 1.39     | 61.26 | 143.22 | 43.71 | 56.27 | 10.31 |
| CtbHLH55 | 0.02  | 0.02   | 0        | 0       | 0.2   | 0.37  | 0.62  | 1.28  | 0.4   | 0.25  | 0.14  | 0.01  | 0.25     | 0.16     | 0.08     | 0.08     | 0.47  | 0.71   | 0.18  | 0.16  | 0     |
| CtbHLH56 | 15.04 | 18.15  | 18.66    | 18.46   | 17.59 | 8.91  | 9.28  | 10.29 | 13.42 | 17.77 | 6.46  | 13.04 | 10.91    | 9.72     | 17.06    | 7.55     | 21.16 | 22.33  | 20.83 | 25.08 | 27.63 |
| CtbHLH57 | 0.15  | 0.29   | 1.07     | 0       | 0.61  | 2.65  | 7.72  | 13.13 | 17.35 | 0.05  | 0     | 0     | 0        | 0        | 0        | 0        | 0.01  | 0.02   | 0     | 0     | 0.51  |
| CtbHLH58 | 0.7   | 0.92   | 0.82     | 0.4     | 0.66  | 1.58  | 1.26  | 8.59  | 5.19  | 4.66  | 0.81  | 0.18  | 1.01     | 0.68     | 0.71     | 0.23     | 1.91  | 2.61   | 2.85  | 3.45  | 1.77  |
| CtbHLH59 | 0     | 0      | 0        | 0       | 0.17  | 0.01  | 0     | 0.03  | 0.35  | 0.06  | 0.03  | 0     | 0.1      | 0.1      | 1.39     | 0.1      | 0.02  | 0      | 0     | 0     | 0.84  |
| CtbHLH60 | 0     | 0      | 0        | 0       | 16.68 | 3.29  | 1.66  | 0.1   | 0     | 0.05  | 1.03  | 0.63  | 0.96     | 1.27     | 1.5      | 0.71     | 0.02  | 0.01   | 0.01  | 0.03  | 0     |
| CtbHLH61 | 0.14  | 0.27   | 2.78     | 7.6     | 5.32  | 18.3  | 21.79 | 18.45 | 67.24 | 5.75  | 12.42 | 9.53  | 14.48    | 11.47    | 3.64     | 1.47     | 6.92  | 5.23   | 32.12 | 84.18 | 31.16 |
| CtbHLH62 | 0.24  | 0.28   | 0        | 0       | 0.04  | 2.9   | 3.94  | 3.21  | 10.28 | 0     | 0     | 0     | 0        | 0        | 0        | 0        | 0     | 0.05   | 0     | 0.01  | 0     |
| CtbHLH63 | 5.25  | 7.44   | 4.37     | 5.11    | 12.44 | 1.96  | 6.21  | 3.32  | 10.1  | 6.46  | 0.73  | 1.12  | 9.92     | 4.05     | 27.16    | 1.78     | 5.5   | 5.57   | 5.93  | 6.78  | 5.75  |
| CtbHLH64 | 0.06  | 0.02   | 0.04     | 0       | 0.13  | 1.05  | 1.11  | 9.53  | 1.12  | 2.19  | 1.68  | 0.11  | 1.87     | 1.17     | 1.24     | 0.35     | 8.67  | 1.36   | 1.05  | 0.47  | 0.54  |
| CtbHLH65 | 0     | 0      | 0        | 0       | 0.78  | 0.25  | 0.25  | 2.7   | 0.25  | 0.01  | 0.29  | 0.32  | 0.18     | 0.45     | 0.38     | 0.03     | 0     | 0      | 0.02  | 0     | 0     |
| CtbHLH66 | 0     | 0      | 0        | 0       | 0.33  | 0.27  | 0.33  | 2.05  | 0.59  | 0.01  | 0.13  | 0.16  | 0.04     | 0.14     | 0.09     | 0.07     | 0.24  | 0.15   | 0     | 0     | 0     |
| CtbHLH67 | 0     | 0      | 0        | 0       | 0.44  | 0.55  | 0.6   | 5.76  | 0.9   | 0     | 0.46  | 0.25  | 0.31     | 0.47     | 0.23     | 0.05     | 0     | 0      | 0     | 0     | 0     |
| CtbHLH68 | 2.96  | 6.93   | 7.02     | 7.01    | 1.82  | 6.22  | 7.35  | 0.68  | 0.96  | 27    | 0.96  | 1.9   | 0.84     | 1.11     | 1.67     | 0.45     | 5.63  | 5.91   | 10.61 | 8.63  | 5.41  |
| CtbHLH69 | 13.24 | 14.74  | 25.96    | 33.48   | 11.47 | 5.95  | 8.32  | 7.88  | 6.28  | 16.56 | 5.01  | 6.68  | 5.13     | 5.86     | 6.36     | 5.35     | 6.16  | 6.75   | 7.63  | 14.65 | 37.96 |

Table S3. *Cont.*

| Gene     | White | Yellow | LightRred | DeepRred | 1DAG  | 3DAG   | 5DAG  | 7DAG  | 10DAG  | DAF0  | DAF10 | DAF20 | HL_DAF10 | HL_DAF20 | LL_DAF10 | LL_DAF20 | SBS   | MBS    | IFS    | PFS    | DFS    |
|----------|-------|--------|-----------|----------|-------|--------|-------|-------|--------|-------|-------|-------|----------|----------|----------|----------|-------|--------|--------|--------|--------|
| CtbHLH70 | 30.44 | 41.44  | 37.32     | 7.92     | 0.11  | 0.39   | 0.58  | 0.34  | 0.13   | 28.59 | 0.22  | 0.11  | 0.27     | 0.58     | 1.45     | 0.44     | 8.53  | 7.19   | 18.64  | 8.58   | 2.7    |
| CtbHLH71 | 0     | 0      | 0         | 0        | 0.03  | 1.74   | 1.79  | 3.7   | 2.56   | 0.78  | 1.1   | 0.03  | 0.69     | 0.4      | 0.91     | 0.23     | 0.66  | 0.13   | 0.02   | 0      | 0      |
| CtbHLH72 | 0     | 0      | 0         | 0        | 0.35  | 1.46   | 2.71  | 0.12  | 0.05   | 0.03  | 0     | 0.05  | 0.02     | 0.02     | 0        | 0        | 0.05  | 0.01   | 0      | 0.05   | 0.07   |
| CtbHLH73 | 0.07  | 0.39   | 0.27      | 0.08     | 0.35  | 2.93   | 6.63  | 1.13  | 4.29   | 0     | 0.03  | 0.02  | 0.06     | 0.08     | 0.13     | 0.02     | 0.71  | 0.22   | 0.12   | 0.18   | 0.05   |
| CtbHLH74 | 0.12  | 0.06   | 0.02      | 0.02     | 0     | 1.36   | 1.41  | 1.7   | 1.51   | 0.01  | 0.03  | 0.02  | 0.09     | 0.07     | 0.08     | 0.06     | 0.14  | 0.05   | 0.04   | 0.09   | 0.1    |
| CtbHLH75 | 1.52  | 16.77  | 3.09      | 0.82     | 5.14  | 9.68   | 9.76  | 11.16 | 46.27  | 1.01  | 0.15  | 0.12  | 0.33     | 0.34     | 0.64     | 0.09     | 1.71  | 1.08   | 7.9    | 19.43  | 2.58   |
| CtbHLH76 | 1.69  | 2.05   | 3.53      | 4.75     | 0.92  | 2.8    | 17.74 | 6.31  | 43.31  | 0.52  | 0.98  | 1.13  | 0.31     | 0.73     | 0.08     | 0.36     | 0.13  | 0.06   | 0.55   | 1.19   | 0.57   |
| CtbHLH77 | 40.12 | 28.15  | 17.77     | 22.02    | 10.85 | 7.88   | 6.52  | 5.71  | 6.86   | 22.72 | 0.81  | 0.59  | 1.86     | 0.95     | 3.77     | 0.89     | 6.11  | 5.61   | 10.73  | 10.03  | 5.38   |
| CtbHLH78 | 0     | 0      | 0         | 0        | 59.85 | 185.07 | 69.22 | 8.82  | 19.46  | 0     | 0.19  | 1.66  | 0.44     | 0.76     | 0.08     | 0.09     | 0.03  | 0      | 0      | 0      | 0      |
| CtbHLH79 | 6.18  | 10.13  | 5.83      | 7.12     | 55.98 | 29.14  | 27.25 | 1.53  | 0.4    | 1.91  | 7.57  | 7.9   | 8.23     | 8.35     | 8.98     | 4.68     | 40.61 | 22.78  | 5.22   | 10.28  | 2.67   |
| CtbHLH80 | 0     | 0      | 0         | 0.03     | 0     | 0.89   | 0.71  | 0.16  | 0.08   | 0     | 0     | 0     | 0        | 0        | 0        | 0        | 0     | 0      | 0      | 0      | 0      |
| CtbHLH81 | 0.11  | 0.22   | 0.15      | 0.57     | 5.04  | 27.63  | 22.53 | 7.78  | 9.05   | 0.82  | 5.85  | 57.54 | 4.4      | 21.58    | 1.23     | 9.58     | 2.53  | 1.6    | 0.76   | 0.47   | 0.35   |
| CtbHLH82 | 0     | 0      | 0.04      | 0.06     | 2.28  | 2.96   | 2.72  | 3.23  | 9      | 1.25  | 2.09  | 0.84  | 1.72     | 2.28     | 2.55     | 0.88     | 1.66  | 0.9    | 0.54   | 0.14   | 1.15   |
| CtbHLH83 | 0.04  | 0.14   | 0.47      | 0.78     | 8.95  | 8.75   | 1.73  | 19.65 | 0.02   | 20.78 | 19.22 | 0.77  | 30.43    | 8.28     | 27.33    | 2.2      | 10.01 | 6.96   | 8.31   | 1.92   | 0.86   |
| CtbHLH84 | 0     | 0      | 0         | 0        | 1.61  | 8.55   | 3.45  | 0.15  | 0.06   | 0.2   | 0     | 0.02  | 0        | 0.06     | 1.39     | 0.11     | 0.11  | 0      | 0      | 0      | 0.04   |
| CtbHLH85 | 1.81  | 1.57   | 2.43      | 0.93     | 25.82 | 34.11  | 18.7  | 7.15  | 7.21   | 62.33 | 81.59 | 19.55 | 106.29   | 66.53    | 56.78    | 7.79     | 47.7  | 33.64  | 25.48  | 3.6    | 5.1    |
| CtbHLH86 | 59.34 | 65.01  | 64.49     | 75.21    | 42.18 | 53.25  | 62.77 | 54.99 | 144.98 | 81.37 | 32.03 | 29.93 | 47.37    | 31.36    | 76.98    | 17.68    | 110.1 | 109.94 | 109.18 | 97.73  | 124.54 |
| CtbHLH87 | 0.38  | 0.23   | 0.33      | 0.86     | 0.81  | 0.22   | 0.38  | 0.33  | 0.18   | 0.59  | 0.02  | 0.25  | 0.12     | 0.14     | 0.09     | 0.26     | 0     | 0.02   | 0      | 0.1    | 0.18   |
| CtbHLH88 | 82.75 | 92.39  | 107.15    | 172.82   | 11.48 | 5.21   | 3.99  | 4.2   | 8.22   | 33.27 | 2.43  | 5.76  | 4.86     | 6.17     | 9.25     | 2.37     | 20.48 | 43.62  | 88.19  | 112.09 | 47.58  |
| CtbHLH89 | 0     | 0      | 0         | 0        | 28.81 | 3.17   | 2.83  | 10.24 | 1.98   | 0.07  | 1.55  | 1.78  | 0.52     | 1.99     | 1.34     | 2.38     | 0.03  | 0      | 0      | 0.02   | 0.19   |
| CtbHLH90 | 15.91 | 14.35  | 43.41     | 13.64    | 0.07  | 0.07   | 0.24  | 0.16  | 0.12   | 0.11  | 0.02  | 0.02  | 0.02     | 0.01     | 0.05     | 0.02     | 0.03  | 0.05   | 3.01   | 8.32   | 0.07   |
| CtbHLH91 | 2.51  | 3.07   | 2.68      | 5.78     | 66.93 | 6.17   | 7.95  | 5.42  | 15.72  | 4.56  | 1.27  | 3.76  | 2.96     | 2.5      | 8.1      | 2.59     | 4.57  | 4.2    | 3.97   | 3.23   | 4.24   |
| CtbHLH92 | 0     | 0      | 0         | 0        | 0.03  | 0.56   | 0.43  | 0.13  | 0.06   | 0     | 0     | 0     | 0        | 0.01     | 0        | 0        | 0     | 0      | 0      | 0      | 0      |

Table S3. *Cont.*

| Gene      | White | Yellow | LightRred | DeepRred | 1DAG  | 3DAG  | 5DAG  | 7DAG  | 10DAG | DAF0  | DAF10 | DAF20 | HL_DAF10 | HL_DAF20 | LL_DAF10 | LL_DAF20 | SBS   | MBS   | IFS   | PFS   | DFS   |
|-----------|-------|--------|-----------|----------|-------|-------|-------|-------|-------|-------|-------|-------|----------|----------|----------|----------|-------|-------|-------|-------|-------|
| CtbHLH93  | 4.18  | 9.39   | 5.58      | 11.52    | 10.29 | 9.98  | 12.09 | 22.66 | 31.96 | 12.83 | 5.61  | 14.49 | 12.72    | 8.5      | 12.66    | 4.53     | 13.9  | 10.11 | 9.82  | 13.92 | 15.67 |
| CtbHLH94  | 40.17 | 45.77  | 43.46     | 42.02    | 23.34 | 10.3  | 8.15  | 8.94  | 11.97 | 24.95 | 9.94  | 42.03 | 16.43    | 31.94    | 17.91    | 22.42    | 22.11 | 32.59 | 30.27 | 31.14 | 38.51 |
| CtbHLH95  | 1.02  | 0.68   | 1.36      | 0.53     | 6.41  | 11.71 | 13.84 | 7.28  | 27.31 | 1.34  | 10.68 | 11.83 | 8.64     | 11.12    | 0.59     | 8.87     | 5.82  | 4.43  | 0.88  | 0.7   | 0.89  |
| CtbHLH96  | 3.33  | 0.35   | 1.14      | 0.45     | 39.47 | 4.42  | 3.3   | 3.09  | 2.61  | 9     | 2.75  | 3.38  | 5.66     | 3.46     | 2.58     | 1.22     | 4.05  | 3.08  | 5.47  | 0.41  | 0.94  |
| CtbHLH97  | 0.55  | 1.5    | 1.42      | 1.07     | 54.88 | 17    | 18.04 | 10.18 | 23.38 | 0.97  | 7.16  | 21.54 | 7.38     | 12.46    | 1.67     | 6.88     | 0.69  | 0.77  | 1.36  | 1.91  | 2.83  |
| CtbHLH98  | 0.03  | 0.03   | 0         | 0        | 0.45  | 0.88  | 0.93  | 1.61  | 1.14  | 0.26  | 0.71  | 1.49  | 0.51     | 0.56     | 0.73     | 0.65     | 1.37  | 0.74  | 0.51  | 0.12  | 0.04  |
| CtbHLH99  | 2.03  | 4.19   | 1.71      | 7.37     | 0.01  | 0.24  | 0.29  | 0.28  | 1.32  | 0.05  | 0.03  | 0.01  | 0.04     | 0.01     | 0.05     | 0.03     | 0.14  | 0.02  | 0.7   | 2.64  | 4.64  |
| CtbHLH100 | 0     | 0.02   | 0.15      | 0.1      | 22.6  | 4.45  | 3.1   | 1.13  | 22.45 | 26.2  | 5.92  | 20.05 | 7        | 15.6     | 0.01     | 0.02     | 8.48  | 8.51  | 6     | 4.3   | 6.03  |
| CtbHLH101 | 25.73 | 15.79  | 27.31     | 26.13    | 48.77 | 10.23 | 18.76 | 9.28  | 34.72 | 36.88 | 7.8   | 21.65 | 10.19    | 9.96     | 12.76    | 6.1      | 34.69 | 31.68 | 20.73 | 19.83 | 23.4  |
| CtbHLH102 | 7.46  | 6.14   | 6.31      | 3.42     | 25.31 | 8.51  | 6.79  | 1.97  | 8.63  | 3.07  | 0.52  | 10.56 | 0.37     | 1.27     | 0.15     | 3.25     | 10.36 | 7.23  | 5.56  | 3.92  | 2.01  |
| CtbHLH103 | 0.42  | 2.35   | 0.04      | 0.12     | 0.91  | 0.64  | 0.23  | 0.28  | 0.05  | 6.69  | 0.64  | 1.33  | 4.28     | 1.56     | 2.49     | 0.13     | 5.55  | 4.65  | 3.7   | 3.7   | 1.84  |
| CtbHLH104 | 0.04  | 3.27   | 0.04      | 0.04     | 1.13  | 0.96  | 0.86  | 0.06  | 0.14  | 6.19  | 1.02  | 1.83  | 2.02     | 2.4      | 1.32     | 0.62     | 11.17 | 10.19 | 8     | 6.53  | 7.12  |
| CtbHLH105 | 6.09  | 4.7    | 0.73      | 0.54     | 1.99  | 5.92  | 5.89  | 0.27  | 1.13  | 3.41  | 0.06  | 0.54  | 1.78     | 1.03     | 3.53     | 0.35     | 2.96  | 2.23  | 2.52  | 3.68  | 3.17  |
| CtbHLH106 | 0.25  | 0.14   | 0.13      | 0.23     | 3.29  | 1.29  | 1.8   | 0.81  | 0.24  | 3.75  | 0.85  | 0.9   | 0.77     | 1.24     | 2.36     | 0.2      | 2.58  | 2.11  | 1.72  | 0.3   | 0.66  |
| CtbHLH107 | 0.75  | 1.07   | 6.05      | 7.13     | 4.16  | 1.87  | 1.72  | 6.52  | 0.28  | 31.06 | 11.18 | 6.54  | 17.08    | 15.43    | 9.94     | 2.76     | 45.73 | 27.22 | 36.26 | 3.99  | 20.39 |
| CtbHLH108 | 0.03  | 0.11   | 0         | 0        | 1.3   | 0.14  | 0.4   | 0.28  | 3.14  | 0.09  | 0.01  | 0.08  | 0        | 0        | 0        | 0        | 0.04  | 0.02  | 0.02  | 0.04  | 0.34  |
| CtbHLH109 | 0     | 0      | 0         | 0        | 0     | 0.32  | 0.84  | 4.22  | 2.1   | 0.07  | 0     | 0     | 0        | 0        | 0.02     | 0        | 0     | 0     | 0.02  | 0.07  | 0.01  |
| CtbHLH110 | 0.51  | 0.86   | 0.53      | 0.34     | 19    | 1.68  | 1.65  | 10.25 | 9.56  | 1.14  | 1.26  | 1.99  | 0.27     | 0.8      | 0.13     | 1.26     | 1.81  | 0.61  | 0.53  | 0.11  | 12.21 |
| CtbHLH111 | 0     | 0      | 0.03      | 0        | 0     | 0     | 0.11  | 0.95  | 0.09  | 0.14  | 0     | 0.01  | 0        | 0        | 0        | 0        | 0     | 0     | 0     | 0     | 0     |
| CtbHLH112 | 0     | 0      | 0         | 0        | 0     | 0.11  | 0.26  | 0.25  | 1.84  | 0     | 0     | 0     | 0        | 0        | 0        | 0        | 0.14  | 0.11  | 0     | 0     | 0     |
| CtbHLH113 | 4.87  | 12.76  | 15.6      | 8.64     | 0.76  | 0.99  | 0.95  | 2.42  | 0.62  | 7.9   | 0.04  | 0     | 0.23     | 0.63     | 0.25     | 0.04     | 28.97 | 16.98 | 9.46  | 9.89  | 1.73  |
| CtbHLH114 | 0     | 0      | 0         | 0.04     | 33.31 | 34.43 | 18.54 | 0.45  | 0.75  | 0.03  | 1.36  | 1.37  | 0.76     | 1.52     | 0.29     | 0.22     | 0.07  | 0     | 0     | 0.1   | 0.41  |
| CtbHLH115 | 21.9  | 21.19  | 20.3      | 17.69    | 33.87 | 14.21 | 11.21 | 11.73 | 18.13 | 60.24 | 9.14  | 11.74 | 12.05    | 12.92    | 20.53    | 6.99     | 31.56 | 37.9  | 28.43 | 17.09 | 30.74 |



**Table S3. *Cont.***

| Gene      | White | Yellow | LightRred | DeepRred | 1DAG  | 3DAG  | 5DAG  | 7DAG  | 10DAG | DAF0 | DAF10 | DAF20 | HL_DAF10 | HL_DAF20 | LL_DAF10 | LL_DAF20 | SBS  | MBS  | IFS   | PFS   | DFS   |
|-----------|-------|--------|-----------|----------|-------|-------|-------|-------|-------|------|-------|-------|----------|----------|----------|----------|------|------|-------|-------|-------|
| CtbHLH116 | 0.75  | 0.41   | 1.55      | 0.81     | 27.13 | 3.65  | 3.32  | 4.39  | 0.94  | 5.27 | 0.21  | 0     | 10.56    | 3.56     | 22.17    | 2.32     | 0.63 | 0.33 | 1.78  | 0.94  | 17.86 |
| CtbHLH117 | 11.88 | 11.83  | 7.32      | 5.49     | 10.87 | 14.22 | 19.52 | 16.94 | 29.79 | 5.13 | 2.29  | 2.24  | 8.16     | 4.78     | 11.07    | 2.76     | 3.5  | 5.99 | 7.48  | 9.08  | 4.44  |
| CtbHLH118 | 34.86 | 21.64  | 32.43     | 22       | 2.04  | 10.07 | 15.31 | 9.36  | 11.69 | 13.2 | 0.93  | 0.98  | 2.43     | 1.5      | 5.53     | 0.75     | 7.38 | 4.79 | 17.12 | 22    | 5.71  |
| CtbHLH119 | 41.05 | 37.2   | 13.1      | 16.02    | 1.35  | 2.72  | 3.06  | 9.06  | 1.86  | 1.56 | 3.31  | 1.5   | 5.12     | 2.88     | 10.66    | 1.21     | 7.12 | 4.73 | 3.45  | 6.95  | 2.63  |
| CtbHLH120 | 9.36  | 16.16  | 11.44     | 10.12    | 8.32  | 6.63  | 7.24  | 12.38 | 10.46 | 1.96 | 1.99  | 4.82  | 2.49     | 3.91     | 2.72     | 2.32     | 6.32 | 4.8  | 6.18  | 12.69 | 9.66  |

**Table S4.** Primers used in the quantitative real-time PCR analysis

| <b>Gene Name</b> | <b>Forward primer sequence</b> | <b>Reverse primer sequence</b> |
|------------------|--------------------------------|--------------------------------|
| <i>CtbHLH03</i>  | CAAACCCCAGTTGTTTTAC            | TCTTCGTCTTTCCGCCAT             |
| <i>CtbHLH06</i>  | CACCTACCACCACCGTACCT           | TAACCGTCTCCCCAACCTAA           |
| <i>CtbHLH12</i>  | CAAGCCAATCCCACAGAAAG           | TGATGTAGCAGCAACTCCCA           |
| <i>CtbHLH20</i>  | ATGTCGCATCCACCGATC             | TCTCCCTCCTTTGCCTCTC            |
| <i>CtbHLH24</i>  | CACCCCCCTTCGTATCCCTA           | CTTCCGCTCTCCCTTGTTT            |
| <i>CtbHLH26</i>  | GCTCCATTCTCTTGTTCTCA           | CAAACATCCTTTTCTTCCGTC          |
| <i>CtbHLH42</i>  | CAACACATCATCCTACAATACTCC       | TGCTGCCCTCTCCACAA              |
| <i>CtbHLH51</i>  | AACGGGTAGGGAACGACGT            | TTTGGGTTTGATTGAGGCA            |
| <i>CtbHLH70</i>  | AATGCCTCATCACCTCCTTC           | CTTCTTGGGGTTCACTTCTACA         |
| <i>CtbHLH74</i>  | CCGATGGGGTTGAAGATG             | TCGATTGAGACCAGGAGC             |
| <i>CtbHLH88</i>  | AACAGTCAGACAAACCCTCCA          | GAACCCAAGATTACCACAAAAG         |
| <i>CtbHLH99</i>  | GTGAGCGTTTTAGGCGAGA            | ACAAAGGAGGGGGGGAT              |
| <i>CtbHLH102</i> | GCAGAGCCAAAACCAGAGA            | GTAATGAAGCCAAGCCGAC            |
| <i>CtbHLH105</i> | GCCATTCTTCCAACACC              | CTCAAAGTCCGACCCGTT             |
| <i>CtbHLH119</i> | AGGTGGTGAAGCTGATGGA            | AGATGGCAGTGGCAAGTGA            |
| <i>Ct60S</i>     | TGGAGCTCATCAAGAAGGG            | GGTAAGGACCACAAGACCGTA          |
